# Direct Interaction and Functional Coupling between Human 5-HT<sub>6</sub> Receptor and the Light Chain 1 Subunit of the Microtubule-Associated Protein 1B (MAP1B-LC1)

Soon-Hee Kim<sup>1‡</sup>, Dong Hyuk Kim<sup>1</sup>, Kang Ho Lee<sup>1,2</sup>, Sun-Kyoung Im<sup>1</sup>, Eun-Mi Hur<sup>1</sup>, Kwang Chul Chung<sup>3</sup>, Hyewhon Rhim<sup>1,2\*</sup>

**1** Center for Neuroscience, Brain Science Institute, Korea Institute of Science and Technology, Seoul, Korea, **2** Department of Neuroscience, University of Science and Technology, Daejeon, Korea, **3** Department of Systems Biology, College of Life Science and Biotechnology, Yonsei University, Seoul, Korea

## Abstract

Serotonin (5-HT) receptors of type 6 (5-HT<sub>6</sub>R) play important roles in mood, psychosis, and eating disorders. Recently, a growing number of studies support the use of 5-HT<sub>6</sub>R-targeting compounds as promising drug candidates for treating cognitive dysfunction associated with Alzheimer's disease. However, the mechanistic linkage between 5-HT<sub>6</sub>R and such functions remains poorly understood. By using yeast two-hybrid, GST pull-down, and co-immunoprecipitation assays, here we show that human 5-HT<sub>6</sub>R interacts with the light chain 1 (LC1) subunit of MAP1B protein (MAP1B-LC1), a classical microtubule-associated protein highly expressed in the brain. Functionally, we have found that expression of MAP1B-LC1 regulates serotonin signaling in a receptor subtype-specific manner, specifically controlling the activities of 5-HT<sub>6</sub>R, but not those of 5-HT<sub>4</sub>R and 5-HT<sub>7</sub>R. In addition, we have demonstrated that MAP1B-LC1 increases the surface expression of 5-HT<sub>6</sub>R and decreases its endocytosis, suggesting that MAP1B-LC1 is involved in the desensitization and trafficking of 5-HT<sub>6</sub>R via a direct interaction. Together, we suggest that signal transduction pathways downstream of 5-HT<sub>6</sub>R are regulated by MAP1B, which might play a role in 5-HT<sub>6</sub>R-mediated signaling in the brain.

**Citation:** Kim S-H, Kim DH, Lee KH, Im S-K, Hur E-M, et al. (2014) Direct Interaction and Functional Coupling between Human 5-HT<sub>6</sub> Receptor and the Light Chain 1 Subunit of the Microtubule-Associated Protein 1B (MAP1B-LC1). *PLoS ONE* 9(3): e91402. doi:10.1371/journal.pone.0091402

**Editor:** Per Svenningsson, Karolinska Institute, Sweden

**Received:** July 26, 2013; **Accepted:** February 11, 2014; **Published:** March 10, 2014

**Copyright:** © 2014 Kim et al. This is an open-access article distributed under the terms of the Creative Commons Attribution License, which permits unrestricted use, distribution, and reproduction in any medium, provided the original author and source are credited.

**Funding:** This work was supported by grants from the Pioneer Research Program (No. 2013008915) and Korea Institute of Science and Technology (2E24480), the Republic of Korea. The funders had no role in study design, data collection and analysis, decision to publish, or preparation of the manuscript.

**Competing Interests:** The authors have declared that no competing interests exist.

\* E-mail: hrhim@kist.re.kr

‡ Current address: Division of metabolism and functionality research, Korea Food Research Institute, Gyeonggi-do, 463-746, Korea

## Introduction

Serotonin (5-hydroxytryptamine, 5-HT) is an important neurotransmitter modulating emotion, cognition, sleep, circadian rhythm, and motor functions [1]. Among seven subfamilies of 5-HT receptors (5-HT<sub>1–7</sub> receptors), 5-HT<sub>6</sub>R, along with 5-HT<sub>4</sub> and 5-HT<sub>7</sub> receptors, is a G-protein-coupled receptor (GPCR) positively coupled to adenylate cyclase via G $\alpha$ s proteins [2]. 5-HT<sub>6</sub>R has been considered as a promising therapeutic target for the treatment of neurological diseases because it is exclusively expressed in brain and has no known isoforms [3]. Highest expression of 5-HT<sub>6</sub>R is found in the striatum, amygdala, nucleus accumbens, hippocampus, cortex, olfactory tubercle, thalamus, and hypothalamus in the brain [4]. As expected from distribution, previous studies suggest that 5-HT<sub>6</sub>R plays an important role in cognition, mood, psychosis, and eating disorder [3–7]. However, molecular mechanisms by which such functions relate to 5-HT<sub>6</sub>R signaling are poorly elucidated. To understand 5-HT<sub>6</sub>R signaling, we employed a yeast two-hybrid screening method on a human brain cDNA library with the intracellular domains of human 5-HT<sub>6</sub>R. We previously reported that Fyn, a member of the Src family of non-receptor protein-tyrosine kinase, and Jun activation domain-binding protein-1 (Jab1) interact with human 5-HT<sub>6</sub>R and play significant roles in 5-HT<sub>6</sub>R-mediated signaling in the

central nervous system [8,9]. In the present study, we report that microtubule-associated protein 1B (MAP1B) directly binds to human 5-HT<sub>6</sub>R and functionally modulates its activities.

The vertebrate MAP1 family of microtubule-associated proteins consists of three members, MAP1A, MAP1B, and MAP1S. MAP1B, perhaps the best characterized MAP1 family protein, is predominantly expressed in the developing brain and found at adult stages albeit at lower levels [10]. By controlling microtubule stability and dynamics, MAP1B plays an important role in a variety of cellular functions in the nervous system, ranging from intracellular trafficking to neuritogenesis and degeneration [11–13]. Heavy and light chains of all MAP1 proteins contain structurally and functionally conserved domains that mediate heavy chain-light chain interaction, microtubule binding, and the association with F-actin either by direct interaction or binding to actin-binding proteins [14]. Light chains (LC) generated by proteolytic cleavage of MAP1A and MAP1B are called LC2 and LC1, respectively [14]. In this paper, we have identified that MAP1B interacts with 5-HT<sub>6</sub>R via LC1 (MAP1B-LC1). We have also found that MAP1B-LC1 increases 5-HT<sub>6</sub>R activities by using an FDSS6000 system-based assay and probing changes in extracellular signal-regulated kinase 1/2 (ERK1/2) phosphorylation, well-known downstream signaling of 5-HT<sub>6</sub>R activation. Furthermore, we suggest regulation of surface expression and

endocytosis of the 5-HT<sub>6</sub>R as an underlying mechanism for the MAP1B-LC1-mediated up-regulation of 5-HT<sub>6</sub>R signaling.

## Materials and Methods

### Yeast two-hybrid assay

Yeast two-hybrid assay was performed using the Matchmaker GAL4 two-hybrid system 3 (Clontech, Palo Alto, CA) as described previously [8]. The bait plasmid, pGBKT7/CT of 5-HT<sub>6</sub>R, and the prey plasmid, human brain cDNA library/pACT2, were transformed into yeast strain AH109 and Y187, respectively. After mating of two yeast clones with each other, the diploid colonies were plated on a nutritionally selective plate deficient in adenine, histidine, leucine, and tryptophan (-Ade, -His, -Leu, -Trp) to screen the library. False positives were eliminated using two reporters, ADE2 and HIS3, and MEL1-encoding β-galactosidase was assayed on 5-bromo-4-chloro-3-indolyl-α-D-galactopyranoside (X-α-gal) indicator plates. Doubly positive clones were isolated and characterized by DNA sequencing. β-Galactosidase activity for a yeast two-hybrid assay was measured using a β-galactosidase colony-lift filter assay in accordance with the manufacturer's instructions (Clontech).

### Cell line culture and transfection

HEK293, HeLa, and SH-SY5Y cells were cultured in Dulbecco's modified Eagle's medium (DMEM) or DMEM: Nutrient Mixture F-12 (DMEM/F12 for SH-SY5Y) supplemented with 10% fetal bovine serum, 100 units/ml penicillin, and 100 μg/ml streptomycin at 37°C in a humidified atmosphere containing 5% CO<sub>2</sub>. HEK293 cells stably expressing the HA-tagged 5-HT<sub>6</sub>R (HEK293/HA-6R) and HeLa cells stably expressing the HA-tagged 5-HT<sub>6</sub>R (HeLa/HA-6R) were maintained with 400 μg/ml of G-418. For transient transfection, cells were transfected with each plasmid DNA using Lipofectamine PLUS reagent (Invitrogen, Calsbad, CA). After 24 h of transfection, the cells were prepared for further experiment.

### Primary culture of hippocampal neuron and transfection

All experiments involving animals were performed in accordance with the animal protocol approved by the Institutional Guidelines of Korea Institute of Science and Technology. Dissection and culture of hippocampal neurons were performed as described previously [15]. In brief, hippocampi from newborn mice (postnatal day 1) were collected in a Ca<sup>2+</sup>- and Mg<sup>2+</sup>-free HBSS solution and then digested with papain (Worthington) and DNase I (Sigma) for 40 min at 37°C. Hippocampi were then washed two times with HBSS solution, followed by trituration. Dissociated cells were plated at a density of 100,000 cells/well into 24-well plates containing poly-D-lysine-coated glass coverslips. Neurons were cultured in Neurobasal media supplemented with B27 and 2 mM GlutaMAX (Invitrogen). After 9 days of culture, neurons were transfected using Lipofectamine 2000 (Invitrogen). At 24 hr after transfection, the cells were fixed for immunocytochemistry.

### GST pull-down assay

Plasmids inserted with glutathione S-transferase (GST) and GST-carboxyl-terminus (CT) of the 5-HT<sub>6</sub>R were transformed into *E. coli* BL21 (DE3). Their protein expressions were induced by adding 0.5 mM isopropyl 1-thio-β-D-galactopyranoside at 25°C during the midlog phase. The cells were harvested and lysed by sonication. All GST-tagged proteins (GST-4RCT, GST-6RCT, and GST-7BRCT) were immobilized on glutathione gel. Flag-LC1 gene was transfected into HEK293 cells, and cells were

harvested and lysed in lysis buffer after 24 h transfection. HEK293 cell lysates containing Flag-LC1 protein were incubated with immobilized GST-tagged proteins. GST pull-down assay was performed using the Profound Pull-down GST Protein:Protein Interaction kit (Pierce, Rockford, IL). After three washes with lysis buffer, bound proteins were eluted by boiling for 10 min at 95°C in SDS sample buffer, followed by immunoblotting with anti-Flag (Cell Signaling Technology, Beverly, MA) and anti-GST (Novagen, Madison, WI) antibodies.

### Co-immunoprecipitation

Co-immunoprecipitation was performed as described previously [8,9]. Briefly, cell and brain lysates were precleared with 50 μl of ImmunoPure immobilized protein G Plus (Pierce) and 2 μg of rabbit normal IgG for 1 h. Precleared lysates were incubated with 4 μg of anti-HA (Cell Signaling Technology) and anti-5-HT<sub>6</sub>R (GeneTex Inc., San Antonio, TX) antibodies overnight at 4°C. The lysates were then incubated with 50 μl of ImmunoPure immobilized Protein G Plus for 4 h at 4°C and were washed three times. Immune complex were eluted by boiling for 5 min at 95°C in SDS sample buffer, followed by immunoblotting.

### Immunoblotting

After 12% SDS-polyacrylamide gel electrophoresis, the proteins were transferred to nitrocellulose membrane (Millipore, Bedford, MA). The membranes were blocked with Tris-buffered saline containing 5% skim milk and 0.1% Tween-20 for 1 h at room temperature (RT). After blocking, the membranes were incubated with the respective primary antibodies (anti-Flag, anti-HA, anti-MAP1B, or anti-5-HT<sub>6</sub>R antibodies) overnight at 4°C. After three washes, the membranes were incubated with horseradish peroxidase (HRP)-conjugated secondary antibodies (Jackson ImmunoResearch, West Grove, PA) for 1 h at RT. The immune complexes were visualized with an ECL detection kit (Millipore).

### Immunocytochemistry

Immunocytochemistry was performed as previously described [16] with minor modifications. Cells were fixed with 4% paraformaldehyde at RT for 15 min. Fixed cells were washed three times with phosphate-buffered saline (PBS) and blocked in blocking solution (2% BSA, 0.1% Triton X-100, and 0.1% sodium azide in PBS). GFP-5-HT<sub>6</sub>R was labeled with chicken anti-GFP antibodies (Abcam, 1:1000), followed by labeling with anti-chicken Alexa Fluor 488 (Invitrogen). Endogenous MAP1B was stained with anti-MAP1B antibodies (Abcam, 1:200), followed by labeling with anti-mouse Alexa Fluor 568 (Invitrogen). All secondary antibodies (1:500) were incubated at RT for 1 hr. Cells were viewed with an inverted light microscope (Zeiss Axio observer Z1, Carl Zeiss MicroImaging, Inc) equipped with epifluorescence optics. Images were captured with a CCD camera controlled by Zen software (Carl Zeiss MicroImaging, Inc). A 20 X objective (LD Plan-Neofluar, NA 0.4) was used to record whole neurons. Images were cropped and/or enlarged to show localizations in sufficient detail.

### Assay of 5-HT<sub>6</sub>R activity using an FDSS6000 system

5-HT<sub>6</sub>R activity was measured using an FDSS6000 96-well fluorescence plate reader (Hamamatsu Photonics, Japan) as previously described [17]. Briefly, HEK293 cells were transiently transfected with Gα<sub>15</sub> and 5-HT receptors (5-HT<sub>4</sub>R, 5-HT<sub>6</sub>R, or 5-HT<sub>7B</sub>R) using Lipofectamine Plus. After transfection, cells were seeded into 96-well black wall/clear bottom plates and cultured overnight. The cells were loaded with 5 μM Fluo-4/AM and

0.001% Pluronic F-127 (Molecular Probes, Eugene, OR) and incubated in an HEPES-buffered solution (150 mM NaCl, 5 mM KCl, 1 mM MgCl<sub>2</sub>, 10 mM HEPES, 10 mM glucose and 2 mM CaCl<sub>2</sub>, pH 7.4) for 1 h at 37°C. After three washes, 5-HT receptor activities were assayed with the FDSS6000 system. After determination of a short baseline, 10 μM of 5-HT was added to the cells, and the Ca<sup>2+</sup> response was measured at 480 nm. All data were collected and analyzed using the FDSS6000 system and related software (Hamamatsu Photonics).

#### cAMP accumulation assay for 5-HT<sub>6</sub>, 5-HT<sub>4</sub>, and 5-HT<sub>7B</sub> receptors

To analyze cAMP levels, cAMP dynamic 2 HTRF kits (Cisbio, France) which provide homogeneous high-throughput assay were used. Cells incubated at 37°C in 5% CO<sub>2</sub> and 95% air atmosphere were suspended in PBS containing 2 mM IBMX (3-isobutyl-1-methylxanthine) and stimulated by 10 μM 5-HT. After 30 min, cAMP labeled with the dye d2 and anti-cAMP antibodies labeled with cryptate were added into the cell plates. The plates were incubated at room temperature for 1 h. The fluorescence intensity of accumulated cAMP level was measured at 314 nm excitation, and 668 and 620 nm emission using Flexstation3 microplate reader (Molecular Devices, Downingtown, PA).

#### Surface biotinylation assay

Surface biotinylation assay was performed using Pinpoint Cell Surface Protein Isolation kit (Pierce) as previously described [8]. Briefly, cells were washed with ice-cold PBS and incubated with 0.5 mg/ml of biotin solution in PBS for 30 min at 4°C. To quench the reaction, glycine was added into the cells to a final concentration of 100 mM, and cells were harvested and lysed in lysis buffer. The lysate was added to immobilized streptavidin bead and incubated for 2 h at 4°C. After three washes with lysis buffer, bound proteins were eluted by boiling for 5 min at 95°C in SDS sample buffer followed by immunoblotting with anti-HA, anti-Flag, and anti-β-tubulin (Cell signaling Technology) antibodies.

#### Assessment of membrane/cytosolic distribution of 5-HT<sub>6</sub>R

Cellular distribution of 5-HT<sub>6</sub>R was examined by tracing the GFP that fused to N-terminal of 5-HT<sub>6</sub>R. HEK293 cells were transiently transfected with GFP-5-HT<sub>6</sub>R and Flag-LC1 (or Flag empty vector) genes, and plated and cultured on coverslip for 24 h. The cells were fixed with 4% paraformaldehyde in PBS for 20 min at RT. After wash with PBS, GFP expression in the cells was observed with fluorescence microscope (Olympus, Japan), and the distribution and the amount of fluorescence were analyzed with Meta-Morph imaging program (Molecular Devices, Downingtown, PA).

#### Receptor endocytosis assay

ELISA-based receptor endocytosis assay was performed according to the method previously reported [18]. HeLa/HA-6R cells were transiently transfected with control Flag empty vector or Flag-tagged LC1. After 24 h transfection, the cells were treated with 100 μM 5-HT for 10 min, fixed, and blocked with 1% BSA and 1 mM CaCl<sub>2</sub>. The cells were incubated with anti-HA antibody (1:1000) for 1 h and then HRP-conjugated secondary antibody (1:2000) for 30 min at RT. After washes, the HRP substrate *o*-phenylenediamine dihydrochloride (Sigma-Aldrich) was added and incubated for 30 min in the dark. To stop the reaction, 3 N HCl was added, and absorbance was measured at 492 nm using VersaMax ELISA Microplate reader (Molecular

Devices). Receptor endocytosis is expressed as % of receptors initially present at the membrane, and represents mean ± S.E. of at least five independent experiments carried out in triplicate.

#### Statistical analysis

All experiments were independently repeated three times. The intensity of bands was measured using Image J software ((National Institute of Health, Bethesda, MD) and analyzed using the GraphPad Prism program (GraphPad Software Inc., San Diego, CA). All numeric values are represented as the mean ± S.E. The statistical significance of the data was determined using a Student's unpaired *t* test or one-way analysis of variance (ANOVA) followed by Duncan's tests. Significance was set at *p* < 0.05, and the values of *P* for significant differences are indicated in the text and figure legends.

## Results

### The LC1 of MAP1B is responsible for 5-HT<sub>6</sub>R binding

We previously demonstrated that the C-terminal (CT) region of human 5-HT<sub>6</sub>R interacts with Fyn tyrosine kinase and characterized the downstream signaling pathways of 5-HT<sub>6</sub>R activation regulated by Fyn [8]. We also reported an interaction between 5-HT<sub>6</sub>R and Jab1 and investigated how Jab1 modulates the membrane expression and activity of 5-HT<sub>6</sub>R [9]. Furthermore, we demonstrated that 5-HT<sub>6</sub>R and Jab1 play important roles under conditions of hypoxia *in vitro* and cerebral ischemia *in vivo*. In the present study, we have identified a new binding partner of 5-HT<sub>6</sub>R, MAP1B-LC1, by performing a yeast two-hybrid screening on a human brain cDNA library. We have found that MAP1B-LC1 also binds to the CT region of human 5-HT<sub>6</sub>R based on the yeast two-hybrid screening assay and confirmed the interaction by a GST pull-down assay. Fig. 1A shows schematic diagrams of the 5-HT<sub>6</sub>R and MAP1B. As shown in Fig. 1B, Flag-tagged LC1 specifically interacted with GST-6RCT. To investigate the selectivity of binding between the 5-HT<sub>6</sub>R and MAP1B, we examined whether MAP1B interacts with other serotonin receptors. Among several serotonin receptors, we tested 5-HT<sub>4</sub>R and 5-HT<sub>7B</sub>R which are coupled to G<sub>αs</sub> as 5-HT<sub>6</sub>R is. To this end, we performed GST pull-down assays using intracellular CT regions of 5-HT<sub>4</sub>R (4RCT) and 5-HT<sub>7B</sub>R (7BRCT) as bait proteins. As shown in Fig. 1C, 4RCT and 7BRCT did not bind to MAP1B, while interaction between 6RCT and MAP1B was readily detected.

To validate the interaction that we observed *in vitro* (through the yeast expression system and the GST pull-down assay), we examined their interaction in mammalian cell lines and rat brain by performing a co-immunoprecipitation assay. For this purpose, Flag-tagged LC1 was transiently transfected into HEK293 cells stably expressing the HA-tagged 5-HT<sub>6</sub>R (HEK293/HA-6R), and then cell lysates were subjected to immunoprecipitation with anti-HA antibodies, followed by immunoblotting with anti-Flag antibodies. As shown in Fig. 1D, Flag-LC1 was able to bind to HA-5-HT<sub>6</sub>R in HEK293 cells. We then tested the interaction in human neuroblastoma SH-SY5Y cells, which express MAP1B endogenously. SH-SY5Y cells were transiently transfected with HA-5-HT<sub>6</sub>R, immunoprecipitated with anti-HA antibodies, and subsequently immunoblotted with anti-MAP1B antibodies. As shown in Fig. 2A, HA-5-HT<sub>6</sub>R was able to bind to endogenous MAP1B protein in SH-SY5Y cells, whereas no signal was detected in immunoprecipitates using control IgG antibody.

We also detected the association between 5-HT<sub>6</sub>R and MAP1B in rat brain lysates. As shown in Fig. 2B, endogenous 5-HT<sub>6</sub>R selectively bound to endogenous MAP1B (third lane) in rat brain,

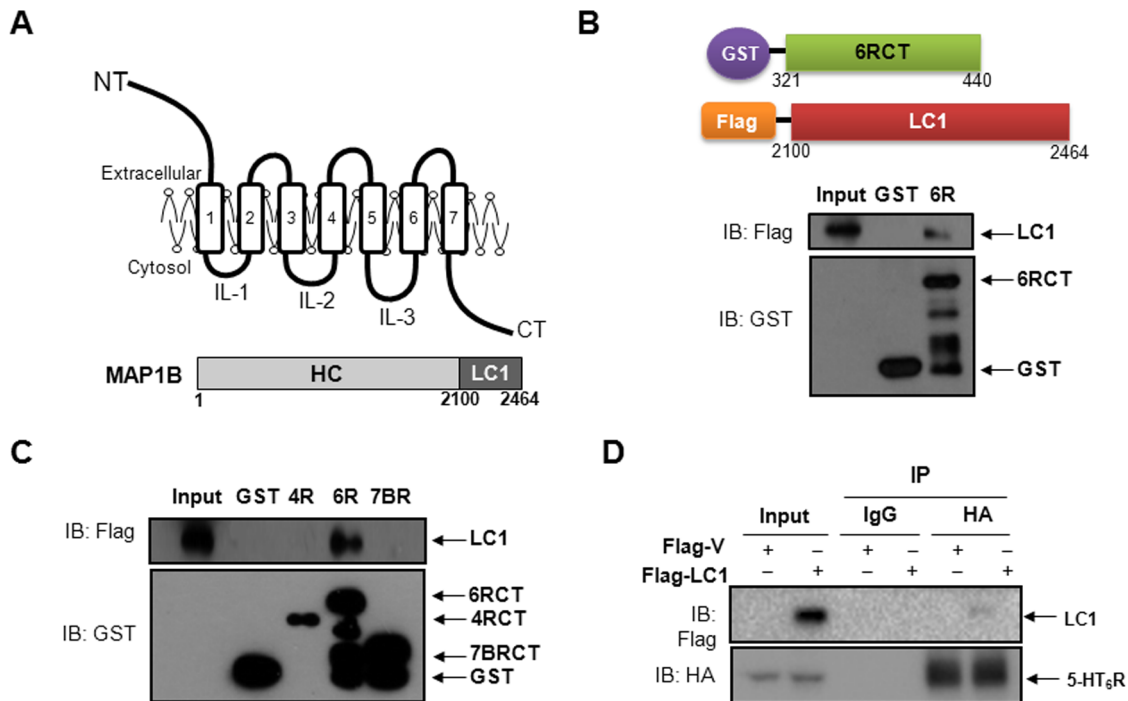

**Figure 1. Interaction of MAP1B-LC1 with 5-HT<sub>6</sub>R by using GST pull-down and co-immunoprecipitation assays in HEK293/6R cells.** (A) Schematic diagrams of the 5-HT<sub>6</sub>R and MAP1B. Numbers indicate amino acid positions for human MAP1B (according to database entry XM\_005248507). (B) *Upper*, Schematic illustration of GST-fused CT of 5-HT<sub>6</sub>R and Flag-tagged LC1 of MAP1B; *lower*, direct binding between CT of 5-HT<sub>6</sub>R and MAP1B-LC1 using GST pull-down assay. (C) GST pull-down assays between MAP1B and CTs of 5-HT<sub>4</sub>, 5-HT<sub>6</sub>, or 5-HT<sub>7B</sub> receptors (GST-4RCT, GST-6RCT, or GST-7BRCT). (D) *In vitro* interaction between Flag-LC1 and HA-5-HT<sub>6</sub>R was determined by immunoprecipitation with anti-HA antibodies in HEK293/HA-6R cells.

doi:10.1371/journal.pone.0091402.g001

whereas no signal was detected in immunoprecipitates using control IgG antibody (second lane). We confirmed the interaction by performing co-immunoprecipitation in a reverse manner, where anti-MAP1B antibodies were used for immunoprecipitation, followed by immunoblotting with 5-HT<sub>6</sub>R antibodies (Fig. 2C). We next examined the co-localization of 5-HT<sub>6</sub>R and MAP1B using double immunofluorescence staining methods. In cultured hippocampal neurons, we examined the co-localization of endogenous MAP1B and exogenously transfected GFP-5-HT<sub>6</sub>R. As illustrated in Fig. 2D, GFP-5-HT<sub>6</sub>R and MAP1B were present at the cell membrane and also in neurites. These results strongly demonstrate that MAP1B interacts with human 5-HT<sub>6</sub>R not only in mammalian cell lines, but also in native brain and hippocampal neurons.

#### MAP1B-LC1 selectively modulates the 5-HT<sub>6</sub>R activity

Physical interaction between 5-HT<sub>6</sub>R and MAP1B via the LC1 subunit suggests that MAP1B-LC1 might affect 5-HT<sub>6</sub>R activity. To test this possibility, we applied our previously developed assay system to assess 5-HT<sub>6</sub>R activities [17,19]. In this assay system, co-transfected  $G\alpha_{15}$  along with 5-HT<sub>6</sub>R facilitates the association of  $G\alpha_s$ -coupled receptors with phospholipase C, and subsequently increases intracellular  $Ca^{2+}$  release, which can be detected by using an FDSS6000 96-well fluorescence plate reader. As shown in Fig. 3A, ectopic expression of Flag-LC1 significantly increased 5-HT-induced intracellular  $Ca^{2+}$  response in HEK293 cells that had been transiently transfected with 5-HT<sub>6</sub>R and  $G\alpha_{15}$ . This LC1-mediated increase in 5-HT<sub>6</sub>R activity was observed over a wide range of 5-HT concentrations, detected from 1 nM to 10  $\mu$ M (Fig. 3B). Concentration-response curves to 5-HT showed a significantly

increased maximum response with LC1 expression ( $131.1 \pm 3.8\%$  of control in the presence of Flag-LC1). However, there was no apparent change in 5-HT<sub>6</sub>R affinity. The calculated EC<sub>50</sub> values were  $62.3 \pm 11.2$  nM and  $43.6 \pm 6.1$  nM in the absence and presence of Flag-LC1, respectively ( $n = 9$ ,  $p = 0.38$ ). To ensure that LC1-induced upregulation of 5-HT<sub>6</sub>R activity is specific to the 5-HT<sub>6</sub>R subtype, we examined whether overexpression of LC1 brings a change in the activities of 5-HT<sub>4</sub>R and 5-HT<sub>7B</sub>R. As shown in Fig. 3C, the expression of LC1 specifically increased 5-HT<sub>6</sub>R activity without changing 5-HT<sub>4</sub>R or 5-HT<sub>7B</sub>R activities. We confirmed equivalent expression levels of Flag-LC1 in the three conditions expressing different types of 5-HT receptors.

Because 5-HT<sub>6</sub>R is positively coupled to adenylate cyclase via  $G\alpha_s$  proteins, we examined the effect of MAP1B-LC1 expression on 5-HT-induced cAMP level. As indicated in Fig. 3D, overexpression of Flag-LC1 increased 5-HT-induced cAMP level in HEK293/HA-6R cells. Coexpression of Flag-LC1 with 5-HT<sub>6</sub>R enhanced 5-HT-elicited increase in cAMP level without changing 5-HT<sub>6</sub>R apparent affinity for 5-HT (Fig. 3E). The calculated EC<sub>50</sub> values were  $74.9 \pm 21.0$  nM and  $90.2 \pm 23.7$  nM in the absence and presence of Flag-LC1, respectively ( $n = 3$ ). This Flag-LC1-induced increase in cAMP level occurred exclusively in 5-HT<sub>6</sub>R-expressing but not 5-HT<sub>4</sub>R- or 5-HT<sub>7B</sub>R-expressing HEK293 cells (Fig. 3F). Recent studies including ours have reported that these  $G\alpha_s$  family 5-HT receptors induce Ras-dependent activation of extracellular signal-regulated kinase 1/2 (ERK1/2) [8,20]. We, therefore, confirmed the specific effects of LC1 on 5-HT<sub>6</sub>R by using ERK1/2 phosphorylation as a readout in other cell-types. We used HeLa/HA-6R cells for monitoring 5-HT<sub>6</sub>R activation, and naïve HeLa cells transiently expressing 5-

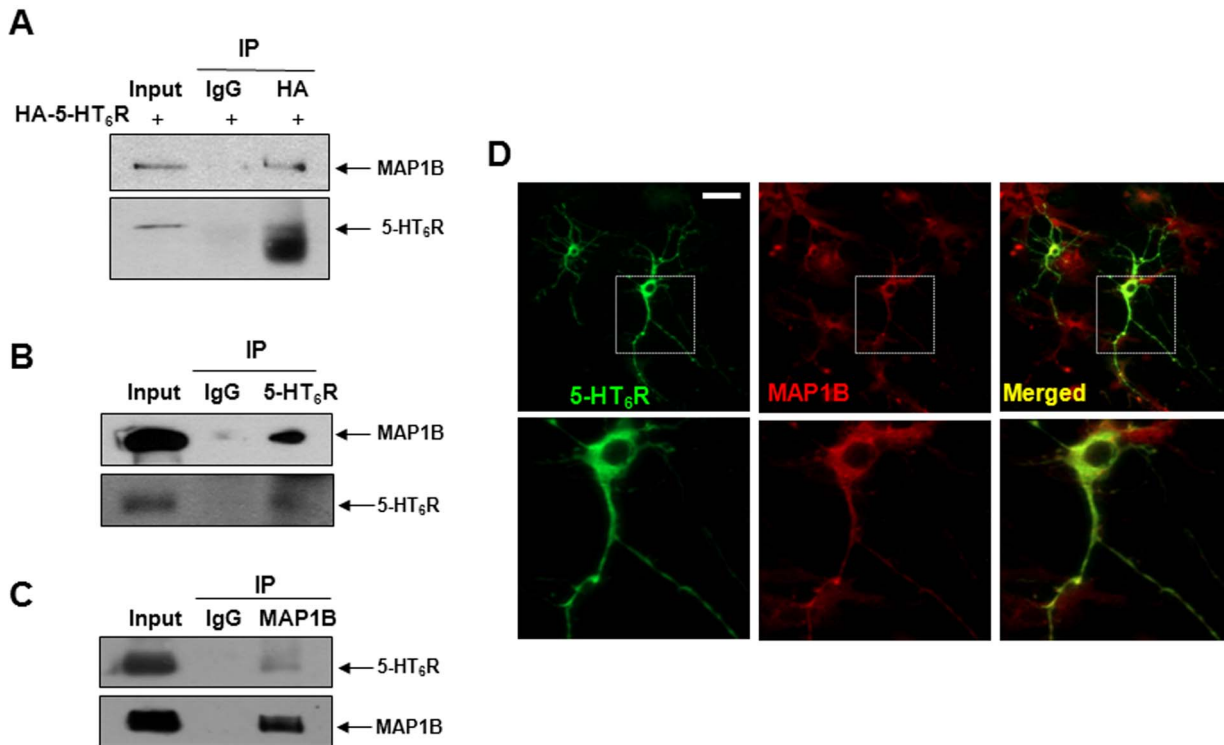

**Figure 2. MAP1B directly interacts with 5-HT<sub>6</sub>R in neuroblastoma cells and the brain.** (A) *In vitro* interaction between MAP1B and HA-5-HT<sub>6</sub>R was determined by immunoprecipitation by using anti-HA antibodies in SH-SY5Y cells. (B & C) *In vivo* interaction between 5-HT<sub>6</sub>R and MAP1B was examined by immunoprecipitation with anti-5-HT<sub>6</sub>R or anti-MAP1B antibodies in the fetal rat brain. (C) Colocalization of 5-HT<sub>6</sub>R-GFP and MAP1B in cultured mouse hippocampal neurons. Shown are representative images of hippocampal neurons stained for 5-HT<sub>6</sub>R-GFP (green) and endogenous MAP1B (red). Boxed areas are enlarged in lower panels. Bar, 20  $\mu$ m. doi:10.1371/journal.pone.0091402.g002

HT<sub>4</sub>R or 5-HT<sub>7B</sub>R for measuring 5-HT<sub>4</sub>R or 5-HT<sub>7</sub>R activation. As shown in Fig. 4A, treatment with 10  $\mu$ M 5-HT increased ERK1/2 phosphorylation in HeLa/HA-6R cells. This was further increased by the expression of increasing amounts of LC1. However, 5-HT-induced ERK1/2 phosphorylation was not affected in 5-HT<sub>4</sub>R- or 5-HT<sub>7B</sub>R-expressing HeLa cells despite that 5-HT-mediated ERK1/2 phosphorylation was evident in these cells (Figs. 4B and C). Taken together, these results suggest that MAP1B-LC1 specifically modulates 5-HT<sub>6</sub>R activity.

#### MAP1B-LC1 modulates surface expression and endocytosis of the 5-HT<sub>6</sub>R

We next examined how overexpression of LC1 increased 5-HT<sub>6</sub>R activity without changing the affinity for the receptor, as previously illustrated in Figs. 3B and E. We quantified the surface expression of 5-HT<sub>6</sub>R in the absence or presence of Flag-LC1 using surface biotinylation experiments. As shown in Fig. 5A, HEK293/HA-6R cells transfected with Flag-LC1 exhibited more 5-HT<sub>6</sub>R at the cell surface than cells transfected only with Flag empty vector (2.27 $\pm$ 0.58 fold increase compared to control,  $n = 3$ ,  $p < 0.05$ ). There was no difference in the level of total expression for 5-HT<sub>6</sub>R proteins. To confirm these results, we examined cellular distribution of 5-HT<sub>6</sub>R by tracing GFP fused to the N-terminal of 5-HT<sub>6</sub>R using immunofluorescence methods. At 24 h after transfection of HeLa cells with GFP-fused 5-HT<sub>6</sub>R and LC1, cellular distribution of 5-HT<sub>6</sub>R was examined. As shown in Fig. 5B<sub>1</sub>, the ratio of membrane to total 5-HT<sub>6</sub>R was significantly increased by the expression of Flag-LC1. The ratio of membrane to cytoplasmic 5-HT<sub>6</sub>R was also significantly enhanced in Flag-

LC1-expressing cells as compared to control cells (0.41 $\pm$ 0.03 vs. 0.54 $\pm$ 0.03,  $n = 31$ ,  $p < 0.05$ , Fig. 5B<sub>2</sub>). We reaffirmed these results by using ELISA-based receptor endocytosis assay in HeLa/HA-6R cells. The increased surface level of 5-HT<sub>6</sub>R was again observed in LC1-expressed HeLa/HA-6R cells (Fig. 5C), supporting the results from biotinylation experiments in HEK293/HA-6R cells. Under the same condition, the cells were treated with 100  $\mu$ M of 5-HT for 10 min, and the difference in the amount of surface 5-HT<sub>6</sub>R before and after 5-HT treatment was evaluated as endocytosis. Endocytosis of the 5-HT<sub>6</sub>R was significantly reduced from 21.3 $\pm$ 4.8% (control) to 4.0 $\pm$ 3.3% (with Flag-LC1) (Fig. 5D). Taken together, these results suggest that LC1 binding to 5-HT<sub>6</sub>R supports the existence of 5-HT<sub>6</sub>R in the membrane, which consequently increases its activity.

#### Functional interaction between the 5-HT<sub>6</sub>R and MAP-LC1 using the Flag-CT and selective ligands of the 5-HT<sub>6</sub>R

To further examine the functional modulation of 5-HT<sub>6</sub>R signaling by MAP1B-LC1, we interfered with the interaction by overexpressing the CT region (amino acid 321-440) of 5-HT<sub>6</sub>R, the binding site of MAP1B-LC1, in HEK293/HA-6R and SH-SY5Y cells. As shown in Fig. 6A, 5-HT-induced ERK1/2 phosphorylation was significantly reduced by the expression of Flag-tagged CT (Flag-6RCT) in HEK293/HA-6R cells. We next examined whether similar results can be obtained from SH-SY5Y cells endogenously expressing MAP1B. At 24 h after transfection of SH-SY5Y cells with either HA-5-HT<sub>6</sub>R alone or together with Flag-6RCT, we examined ERK1/2 phosphorylation upon treatment with a selective agonist or a selective antagonist of 5-HT<sub>6</sub>R,

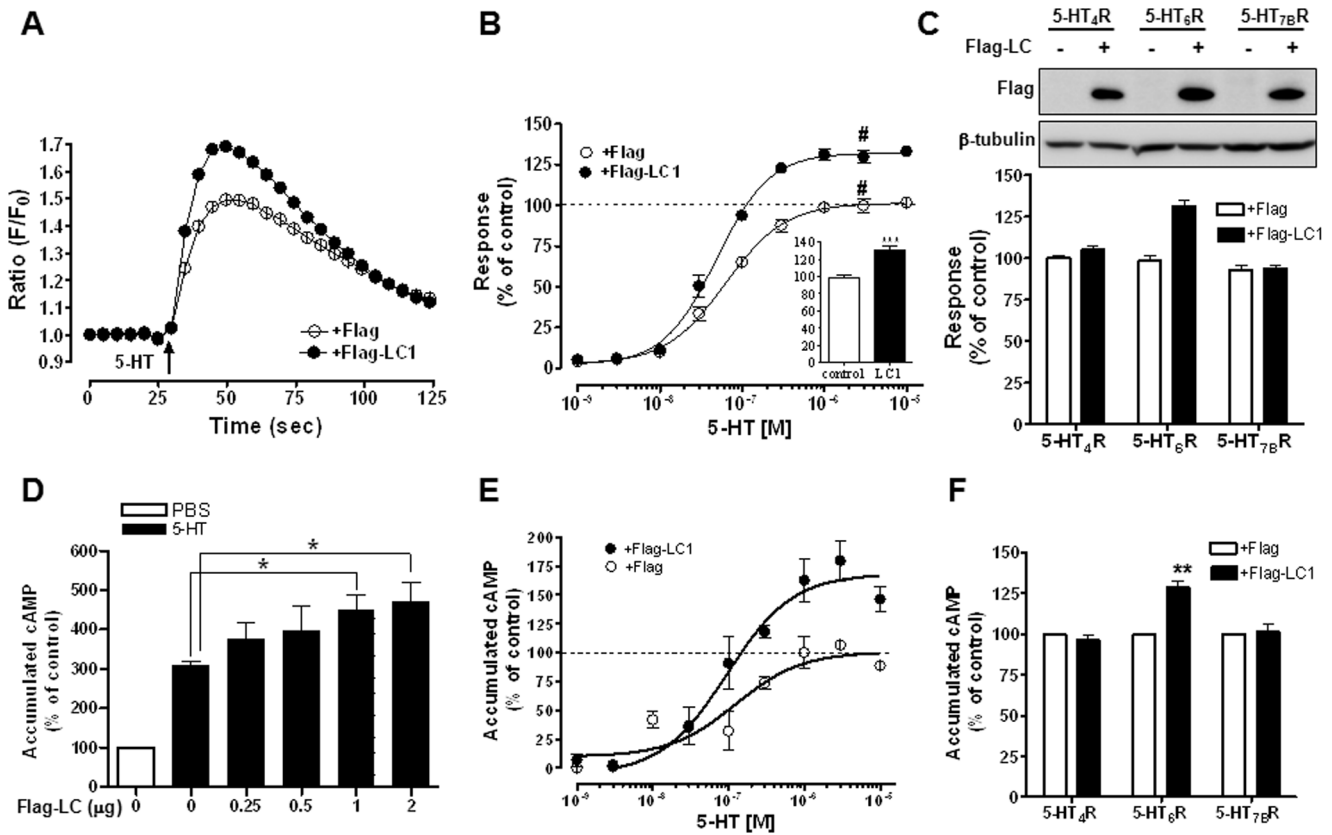

**Figure 3. Expression of MAP1B-LC1 selectively regulates 5-HT<sub>6</sub>R activities.** (A) HEK293 cells were transiently transfected with 5-HT<sub>6</sub>R and G<sub>α</sub><sub>15</sub> in the presence of Flag-vector or Flag-LC1. At 24 h after transfection, Ca<sup>2+</sup> responses induced by 10 μM of 5-HT were measured by using an FDSS6000 system, as described in Materials and Methods. *F* represents fluorescence intensity, and *F*<sub>0</sub> denotes initial fluorescence intensity at 480 nm. (B) Dose-dependency of 5-HT<sub>6</sub>R-mediated Ca<sup>2+</sup> responses in the absence or presence of Flag-LC1. *Inset*, pooled results showing 5-HT-induced Ca<sup>2+</sup> response measured at the indicated dose (#, presented as a percentage value of control). (C) Effect of LC1 overexpression on the activities of other G<sub>α</sub>s-family 5-HT receptors. The 5-HT<sub>4</sub>R, 5-HT<sub>6</sub>R, or 5-HT<sub>7B</sub>R was transfected into HEK293 cells along with Flag-LC1, and intracellular Ca<sup>2+</sup> responses were measured after 5-HT treatment. (D) Measurements of accumulated cAMP in response to 10 μM of 5-HT and increasing amounts of Flag-LC1 (0 – 2 μg). Responses are compared to PBS-treated control condition. (E) Dose-response curve of 5-HT<sub>6</sub>R-mediated cAMP levels in the absence or presence of Flag-LC1. (F) Effects of LC1 on cAMP levels in response to activation of HT<sub>4</sub>R, 5-HT<sub>6</sub>R, or 5-HT<sub>7B</sub>R. \*, *p* < 0.05; \*\*, *p* < 0.01  
doi:10.1371/journal.pone.0091402.g003

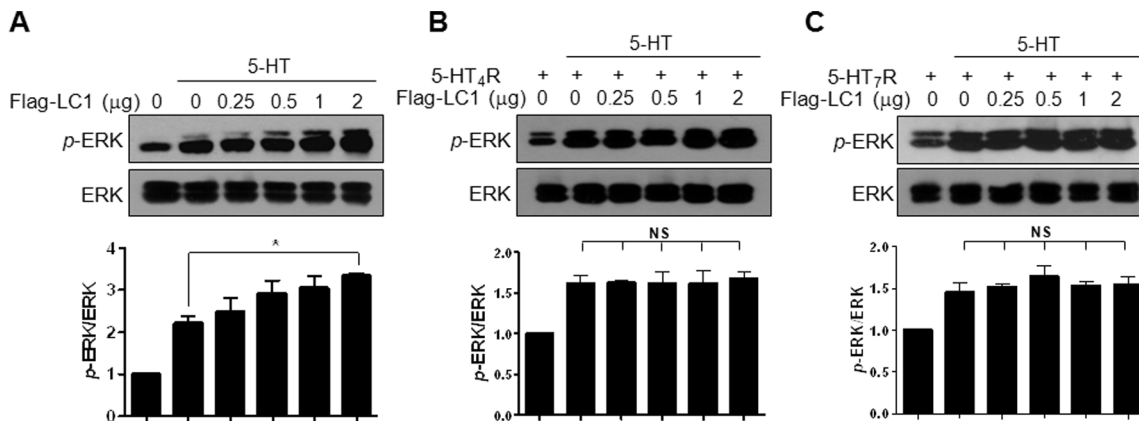

**Figure 4. Effects of MAP1B-LC1 on the 5-HT receptor activities assayed using ERK1/2 activation.** 5-HT-mediated ERK1/2 activation was measured in HeLa/HA-6R cells (A) and HeLa cells transiently transfected with HT<sub>4</sub>R (B) or 5-HT<sub>7B</sub>R (C). Flag-LC1 was transiently transfected into HeLa/HA-6R or naïve HeLa cells, and ERK1/2 phosphorylation induced by 5-HT (10 μM, 5 min) was measured at 24 h after transfection. NS, not significant.  
doi:10.1371/journal.pone.0091402.g004

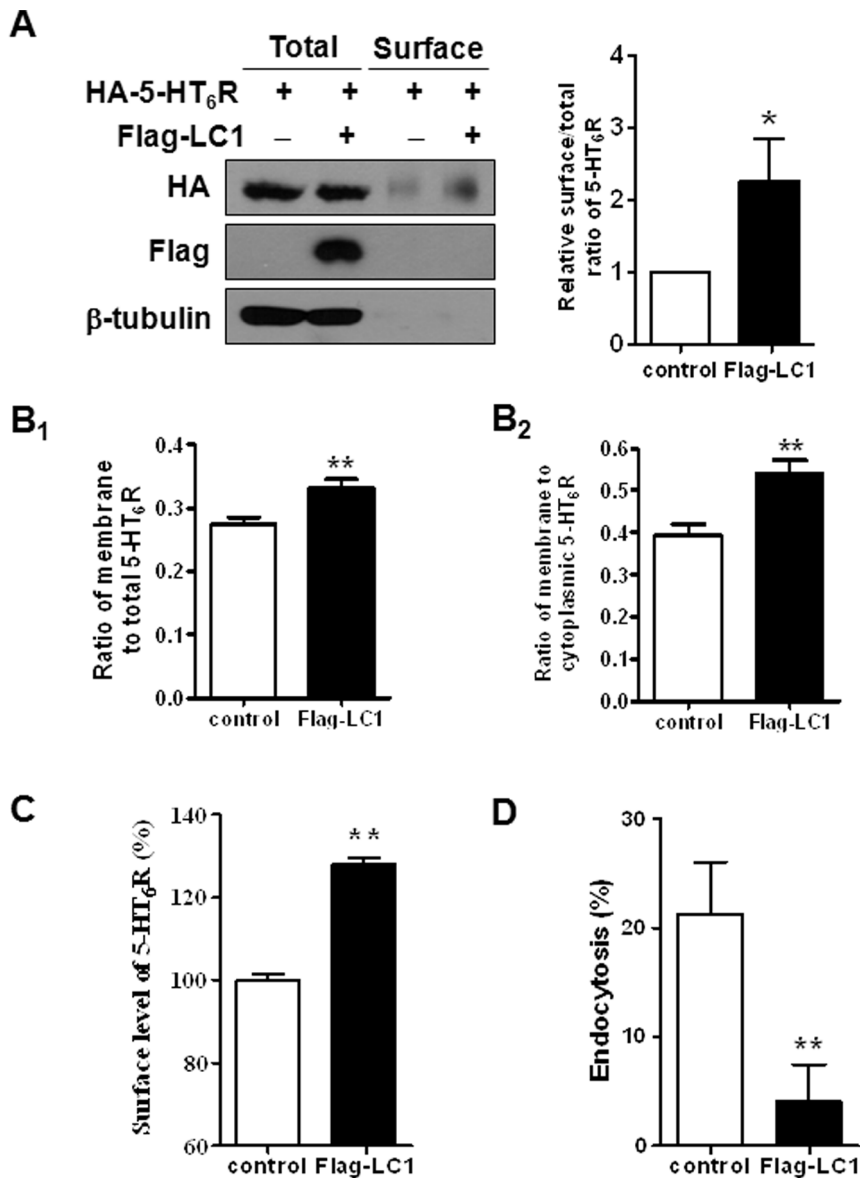

**Figure 5. MAP1B-LC1 modulates the surface expression and agonist-induced endocytosis of 5-HT<sub>6</sub>R.** (A) Effects of MAP1B-LC1 on the surface expression of 5-HT<sub>6</sub>R. Biotinylation experiments from HEK293/HA-6R cells showed that MAP1B-LC1 increased the amount of 5-HT<sub>6</sub>R at the cell surface, but total levels were unaffected. Data were normalized to the surface level of 5-HT<sub>6</sub>R in cells transfected with a control vector. (B) GFP-fused 5-HT<sub>6</sub>R was transfected into HEK293 cells in the absence (control) or presence of Flag-LC1. After 24 h, fluorescence intensity of GFP in the cell membrane and the cytoplasm, as well as total fluorescence levels were analyzed by using Metamorph program. (C) HeLa/HA-6R cells were transiently transfected with a control or Flag-LC1. At 24 h after transfection, the amounts of HA-5-HT<sub>6</sub>R present on the cell surface were measured by performing ELISA with anti-HA antibodies. (D) Under the same condition as in (C), cells were treated with 100 μM of 5-HT for 10 min, and changes in surface 5-HT<sub>6</sub>R were quantified. Receptor endocytosis is expressed as a percentage value of surface receptors initially present at the membrane before 5-HT treatment. Data were obtained from six independent experiments carried out in triplicate.  
doi:10.1371/journal.pone.0091402.g005

alone or in combination. To specifically activate the 5-HT<sub>6</sub>R type without stimulating other types of 5-HT receptors that might be expressed in this neuroblastoma cell line, we applied a recently developed selective agonist of 5-HT<sub>6</sub>R, ST1936 [21]. In SH-SY5Y cells, 10 μM of ST1936 significantly increased ERK1/2 phosphorylation, which was blocked by the treatment with 10 μM of SB258585, a selective antagonist of 5-HT<sub>6</sub>R (Fig. 6B). Treatment with SB258585 alone had no effect on ERK1/2 activation. When Flag-6RCT was overexpressed under these conditions, we observed that Flag-6RCT inhibited ERK1/2 phosphorylation induced by ST1936 (Fig. 6C). These results indicate that

interaction of MAP1B-LC1 with the C-terminal tail region of 5-HT<sub>6</sub>R regulates the activation of ERK1/2.

## Discussion

Since the discovery of the human 5-HT<sub>6</sub>R by Kohen et al. [2], increasing numbers of selective and novel 5-HT<sub>6</sub>R ligands have been developed using high-throughput screening technologies [3,16]. The synthesis of 5-HT<sub>6</sub>R ligands, especially 5-HT<sub>6</sub>R antagonists, has been very successful along with considerably fewer compounds claimed to be selective 5-HT<sub>6</sub>R agonists [6,7].

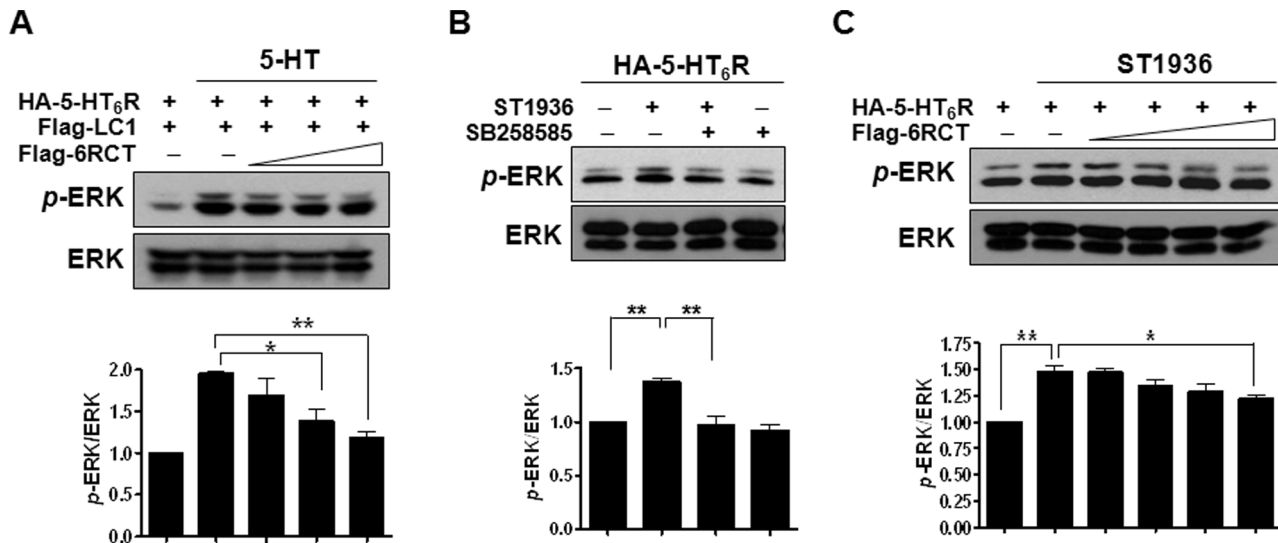

**Figure 6. The effects of overexpression of the carboxyl terminus of 5-HT<sub>6</sub>R on ERK1/2 phosphorylation.** (A) ERK1/2 phosphorylation was examined in HEK293/HA-6R cells transfected with Flag-LC1 (1.5  $\mu$ g) and varying amounts of Flag-6RCT (0, 0.375, 0.75, or 1.5  $\mu$ g). (B) ST1936 (the selective agonist of 5-HT<sub>6</sub>R)-mediated ERK1/2 phosphorylation in SH-SY5Y cells. ST1936 and SB258585, selective antagonists of 5-HT<sub>6</sub>R, were used at the concentration of 10  $\mu$ M. (C) Effects of overexpression of Flag-6RCT on 5-HT<sub>6</sub>R-mediated ERK1/2 phosphorylation in SH-SY5Y cells transfected with HA-5-HT<sub>6</sub>R (1.5  $\mu$ g) and varying amounts of Flag-6RCT (0, 0.375, 0.75, or 1.5  $\mu$ g). doi:10.1371/journal.pone.0091402.g006

Currently, consistent effects have been demonstrated with 5-HT<sub>6</sub>R antagonists in preclinical models of cognition, and the role of these receptors in depression and anxiety has also been postulated although the majority of 5-HT<sub>6</sub>R *in vivo* research has focused on their pro-cognitive effects. However, the preclinical results are somewhat equivocal since both blockade and stimulation of 5-HT<sub>6</sub>R produce pro-cognitive, antidepressant-like, or anti-anxiety-like effects [3]. The explanation for these paradoxical effects remains unclear. Therefore, it is essential to investigate molecular mechanisms by which 5-HT<sub>6</sub>R signaling is connected to such functions. Insights into how 5-HT<sub>6</sub>R signaling affects brain function can be provided by the identification of specific 5-HT<sub>6</sub>R-binding proteins along with the elucidation of how 5-HT<sub>6</sub>R activity or signaling is modulated by such interactions. For example, Meffre et al. [22] recently demonstrated physical interactions between 5-HT<sub>6</sub>R and several proteins involved in the mTOR pathway and identified a molecular substrate underlying modulation of cognition by receptor ligands.

In our previous studies [8,9], two direct interacting proteins, Fyn and Jab1, have been identified. Stimulation of 5-HT<sub>6</sub>R induces ERK1/2 phosphorylation through Fyn, and binding with Fyn upregulates the surface expression of 5-HT<sub>6</sub>R as well as its activity [8]. In another study, we have shown that Jab1 binds to 5-HT<sub>6</sub>R, and upon 5-HT<sub>6</sub>R stimulation, Jab1 translocates from the cytoplasm to the nucleus, leading to the phosphorylation of c-Jun, which in turn enhances the association between Jab1 and c-Jun [9]. In the present study, we have found a third novel binding protein of 5-HT<sub>6</sub>R, MAP1B-LC1 and report three major findings on the physical and functional interaction between 5-HT<sub>6</sub>R and MAP1B-LC1.

Firstly, this is an original report demonstrating direct interaction between human 5-HT<sub>6</sub>R and the LC1 subunit of MAP1B protein. Formation of the 5-HT<sub>6</sub>R-MAP1B-LC1 complex was confirmed by using yeast two-hybrid, GST pull-down, and co-immunoprecipitation assays in two different human-derived cell lines as well as in native rodent brains and hippocampal neurons. We initially employed a yeast two-hybrid screening on the human brain cDNA

library with cDNA fragments encoding the CT of 5-HT<sub>6</sub>R and found MAP1B-LC1 as a binding partner. This specific interaction was further confirmed by using a yeast two-hybrid assay (data not shown) and a GST pull-down assay. Furthermore, co-immunoprecipitation assays in SH-SY5Y neuroblastoma cells and the rat brain (Fig. 2) suggest full length of both 5-HT<sub>6</sub>R and MAP1B interact with each other in native tissues. In addition, immunocytochemistry assays demonstrated that 5-HT<sub>6</sub>R and MAP1B colocalized at the cell membrane and neural processes in cultured hippocampal neurons. Among the intracellular loops 1, 2, 3 (iL1, iL2, and iL3), schematic illustration provided in Fig. 1), and CT regions of the 5-HT<sub>6</sub>R, we used the CT region as a bait because the CT is a common binding region interacting with both Fyn and Jab1 and because physical interaction of this region with the two binding-proteins elicits important effects on HT<sub>6</sub>R signaling [8,9]. Further investigation is necessary to examine if other regions in 5-HT<sub>6</sub>R (e.g. iL1, iL2, or iL3) bind to MAP1B, and subsequently regulate 5-HT<sub>6</sub>R function. Here we showed there is no direct interaction of MAP1B to intracellular CT regions of 5-HT<sub>4</sub>R and 5-HT<sub>7B</sub>R, but additional experiments are required to examine if other regions in 5-HT<sub>4</sub>R or 5-HT<sub>7B</sub>R interact with MAP1B.

Secondly, to the best of our knowledge, the present work is the first report to show modulation of 5-HT<sub>6</sub>R activities and downstream signaling by MAP1B-LC1. Modulation of 5-HT<sub>6</sub>R activities and downstream signaling was confirmed by monitoring various responses, including 5-HT<sub>6</sub>R-mediated Ca<sup>2+</sup> increase, -cAMP accumulation, and ERK1/2 activation. Although MAP1B is known as an abundant neuronal cytoskeleton protein, MAP1B-LC1 specifically modulated the activation and signaling of the 5-HT<sub>6</sub>R type, while leaving those of other G $\alpha$ s-coupled 5-HT receptors, such as 5-HT<sub>4</sub>R and 5-HT<sub>7R</sub>, intact. Through intensive investigation using multiple 5-HT<sub>6</sub>R activity assays, we demonstrated that the expression of Flag-LC1 significantly and consistently increased 5-HT<sub>6</sub>R activities. By contrast, the expression of Flag-LC1 had no effect on the activation or signaling of 5-HT<sub>4</sub>R or 5-HT<sub>7R</sub>.



Thirdly, we have investigated the mechanism by which MAB1B-LC1 controls 5-HT<sub>6</sub>R signaling and found that MAP1B-LC1 modulates the surface expression and endocytosis of 5-HT<sub>6</sub>R. Results from surface biotinylation, direct observation of GFP-fused receptors, and endocytosis assays consistently revealed that the expression of MAP1B-LC1 increased the surface level of 5-HT<sub>6</sub>R and decreased agonist-induced desensitization. Taken together, these results suggest that MAP1B-LC1 functions to retain the surface expression of 5-HT<sub>6</sub>R, and thereby prevents basal and agonist-induced receptor desensitization via a direct interaction, which provides a feasible explanation for the MAP1B-LC1-mediated upregulation of 5-HT<sub>6</sub>R signaling.

The MAP1B-LC1 binds to a variety of signaling molecules, including tumor suppressor p53 [23], RNA-binding protein HuD [24], sodium channels [25], and Rho GTPase regulatory protein, Tiam1 [26]. However, GPCRs are rarely reported as protein interaction partners of MAP1B-LC1. Moritz et al. [27] reported that metabotropic glutamate receptor 4 (mGluR4), a GPCR involved in the regulation of neurotransmitter release, bound to MAP1B, but the region in MAP1B mediating the association, and more importantly, the functional consequences of this interaction on mGluR4 signaling were not investigated. Here, we not only identify the subunit of MAP1B responsible for mediating the specific interaction with 5-HT<sub>6</sub>R, but also demonstrate functional consequences of this interaction. Interestingly, a previous report showed a direct interaction between MAP1B-LC1 and a ligand-gated ion-channel, 5-HT<sub>3</sub>R in HEK293 cells [10]. In contrast to our study, MAP1B-LC1 reduced the surface expression of 5-HT<sub>3</sub>R and accelerated 5-HT<sub>3</sub>R gating properties, such as desensitization kinetics. Whether the interaction occurs in neurons or the brain is still unknown, and the physiological significance of decreased surface expression of 5-HT<sub>3</sub>R by MAP1B-LC1 may need to be evaluated in neuronal cells. Nevertheless, these studies suggest that MAP1B-LC1 might play an important role in the regulation of 5-HT neurotransmitter signaling by controlling surface expression and/or trafficking of receptors and channels.

One important question that should be addressed is how overexpression of the CT region of 5-HT<sub>6</sub>R affects 5-HT- or ST1936-mediated 5-HT<sub>6</sub>R activities as shown in Fig. 6. In our previous study, we used Fyn-SH3 domain, the site in Fyn that binds to 5-HT<sub>6</sub>R, to specifically interfere with the interaction between 5-HT<sub>6</sub>R and Fyn [8]. Overexpression of Fyn-SH3

domain decreased 5-HT-induced pY420 Fyn phosphorylation and ERK1/2 phosphorylation. In the present study, we interrupted the interaction between 5-HT<sub>6</sub>R and MAP1B by expressing the CT region of 5-HT<sub>6</sub>R, and we observed that overexpression of the CT region significantly inhibited 5-HT- and ST1936-mediated ERK1/2 phosphorylation both in HEK293 and SH-SY5Y cells. The effects of MAP1B-LC1 binding to 5-HT<sub>6</sub>R were quite similar to those of Fyn binding [8]. Fyn also functions to increase the surface expression of 5-HT<sub>6</sub>R and 5-HT<sub>6</sub>R-mediated signaling [8]. Given that both Fyn and MAP1B interact with the CT region in 5-HT<sub>6</sub>R, it is possible that the disruption of 5-HT<sub>6</sub>R signaling induced by overexpression of the CT region of 5-HT<sub>6</sub>R could result from interfering with the interaction of 5-HT<sub>6</sub>R with both Fyn and MAP1B. As the two interacting partners retain the surface expression of 5-HT<sub>6</sub>R, which subsequently augments 5-HT<sub>6</sub>R signaling, it is plausible to suggest that binding of Fyn to 5-HT<sub>6</sub>R affects the association between MAP1B and 5-HT<sub>6</sub>R. Similarly MAP1B associating with 5-HT<sub>6</sub>R might have an effect on Fyn-5-HT<sub>6</sub>R interaction, and subsequently modulate 5-HT<sub>6</sub>R-signaling. Previous studies have demonstrated that Fyn can directly phosphorylate a microtubule-associated protein, Tau, which interacts with the SH3 domain in Fyn [28,29]. Therefore, it is tempting to speculate that Fyn and MAP1B work in concert to control microtubule dynamics in the vicinity of 5-HT<sub>6</sub>R, but further research is required to test this possibility.

In conclusion, our results suggest that MAP1B-LC1, an important cytoskeleton protein in the CNS, is involved in the desensitization and trafficking of 5-HT<sub>6</sub>R and consequently controls 5-HT<sub>6</sub>R-mediated signal transduction via a direct interaction.

## Acknowledgments

We extend our appreciation to Drs. Fabio Bordini and Franco Borsini in Sigma-tau for generously providing ST1936.

## Author Contributions

Conceived and designed the experiments: S-HK E-MH KCC HR. Performed the experiments: S-HK DHK KHL S-KI. Analyzed the data: S-HK KHL. Wrote the paper: S-HK E-MH KCC HR.

## References

- Filip M, Bader M (2009) Overview on 5-HT receptors and their role in physiology and pathology of the central nervous system. *Pharmacol Rep*. 61: 761–777.
- Kohen R, Metcalf MA, Khan N, Druck T, Huebner K, et al. (1996) Cloning, characterization, and chromosomal localization of a human 5-HT<sub>6</sub> serotonin receptor. *J Neurochem* 66:47–56.
- Yun HM, Rhim H (2011) The serotonin-6 receptor as a novel therapeutic target. *Exp Neurol*. 20(4): 159–68.
- Woolley ML, Marsden CA, Fone KC (2004) 5-HT<sub>6</sub> receptors. *Curr Drug Targets CNS Neurol Disord*. 3: 59–79.
- East SZ, Burnet PW, Leslie RA, Roberts JC, Harrison PJ (2002) 5-HT<sub>6</sub> receptor binding sites in schizophrenia and following antipsychotic drug administration: autoradiographic studies with [<sup>125</sup>I]SB-258585. *Synapse*. 45: 191–199.
- Codony X, Vela JM, Ramirez MJ (2011) 5-HT<sub>6</sub> receptor and cognition. *Curr Opin Pharmacol* 11: 94–100.
- Marazziti D, Baroni S, Dell'Osso MC, Bordini F, Borsini F (2011) Serotonin receptors of type 6 (5-HT<sub>6</sub>): what can we expect from them? *Curr Med Chem* 18: 2783–2790.
- Yun HM, Kim S, Kim HJ, Kostenis E, Kim JI, et al. (2007) The novel cellular mechanism of human 5-HT<sub>6</sub> receptor through an interaction with Fyn. *J Biol Chem*. 282: 5496–5505.
- Yun HM, Baik JH, Kang I, Jin C, Rhim H (2010) Physical interaction of Jab1 with human serotonin 6 G-protein-coupled receptor and their possible roles in cell survival. *J Biol Chem*. 285: 10016–10029.
- Gonzalez-Billault C, Jimenez-Mateos EM, Caceres A, Diaz-Nido J, Wandosell F, et al. (2004) Microtubule-associated protein 1B function during normal development, regeneration, and pathological conditions in the nervous system. *Dev Neurobiol*. 58(1): 48–59.
- Wiche G, Oberkanins C, Himmler A (1991) Molecular structure and function of microtubule-associated proteins. *Int Rev Cytol*. 124: 217–273.
- Garner CC, Garner A, Huber G, Kozak C, Matus A (1990) Molecular cloning of microtubule-associated protein 1 (MAP1A) and microtubule-associated protein 5 (MAP1B): identification of distinct genes and their differential expression in developing brain. *J Neurochem*. 55: 146–154.
- Sun H, Hu XQ, Emerit MB, Schoenebeck JC, Kimmel CE, et al. (2008) Modulation of 5-HT<sub>3</sub> receptor desensitization by the light chain of microtubule-associated protein 1B expressed in HEK 293 cells. *J Physiol*. 586:751–762.
- Halpain S, Dehmelt L (2006) The MAP1 family of microtubule-associated proteins. *Genome Biol*. 7: 224.
- Kim S, Yun HM, Baik JH, Chung KC, Nah SY, et al. (2007) Functional interaction of neuronal Cav1.3 L-type calcium channel with ryanodine receptor type 2 in the rat hippocampus. *J Biol Chem*. 282(45): 32877–32889.
- Hur EM, Sajjalafu, Lee BD, Kim SJ, Xu WL, et al. (2011) GSK3 controls axon growth via CLASP-mediated regulation of growth cone microtubules. *Genes Dev*. 25(18): 1968–1981.
- Kim HJ, Yun HM, Kim T, Nam G, Roh EJ, et al. (2008) Functional human 5-HT<sub>6</sub> receptor assay for high throughput screening of chemical ligands and binding proteins. *Comb Chem High Throughput Screen*. 11: 316–324.

18. Mnie-Filali O, Amraei MG, Benmbarek S, Archer-Lahlou E, Peñas-Cazorla R, et al. (2010) Serotonin 4 receptor (5-HT4R) internalization is isoform-specific: effects of 5-HT and RS67333 on isoforms A and B. *Cell Signal*. 22(3):501–509.
19. Kim DH, Kim SH, Kim HJ, Jin C, Chung KC, et al. (2010) Stilbene derivatives as human 5-HT(6) receptor antagonists from the root of *Caragana sinica*. *Biol Pharm Bull*. 33, 2024–2028.
20. Norum JH, Hart K, Levy FO (2003) Ras-dependent ERK activation by the human G(s)-coupled serotonin receptors 5-HT4(b) and 5-HT7(a). *J Biol Chem*. 278: 3098–3104.
21. Riccioni T, Bordi F, Minetti P, Spadoni G, Yun HM, et al. (2011) ST1936 stimulates cAMP, Ca<sup>2+</sup>, ERK1/2 and Fyn kinase through a full activation of cloned human 5-HT6 receptors. *Eur J Pharmacol*. 661: 8–14.
22. Meffre J, Chaumont-Dubel S, Mannoury la Cour C, Loiseau F, Watson DJ, et al. (2012) 5-HT(6) receptor recruitment of mTOR as a mechanism for perturbed cognition in schizophrenia. *EMBO Mol Med*. 4(10):1043–56.
23. Lee SY, Kim JW, Jeong MH, An JH, Jang SM, et al. (2008) Microtubule-associated protein 1B light chain (MAP1B-LC1) negatively regulates the activity of tumor suppressor p53 in neuroblastoma cells. *FEBS Lett*. 582: 2826–2832.
24. Fujiwara Y, Kasashima K, Saito K, Fukuda M, Fukao A, et al. (2011) Microtubule association of a neuronal RNA-binding protein HuD through its binding to the light chain of MAP1B. *Biochimie*. 93(5):817–822.
25. O'Brien JE, Sharkey LM, Vallianatos CN, Han C, Blossom JC, et al. (2012) Interaction of voltage-gated sodium channel Nav1.6 (SCN8A) with microtubule-associated protein Map1b. *J Biol Chem*. 287(22):18459–18466.
26. Henríquez DR, Bodaleo FJ, Montenegro-Venegas C, González-Billault C (2012) The light chain 1 subunit of the microtubule-associated protein 1B (MAP1B) is responsible for Tiam1 binding and Rac1 activation in neuronal cells. *PLoS One*. 7(12):e53123.
27. Moritz A, Scheschonka A, Beckhaus T, Karas M, Betz H (2009) Metabotropic glutamate receptor 4 interacts with microtubule-associated protein 1B. *Biochem Biophys Res Commun*. 4: 390(1):82–86.
28. Lee G, Newman ST, Gard DL, Band H, Panchamoorthy G (1998) Tau interacts with src-family non-receptor tyrosine kinases. *J Cell Sci*. 111:3167–3177.
29. Lee G, Thangavel R, Sharma VM, Litersky JM, Bhaskar K, et al. (2004) Phosphorylation of tau by fyn: implications for Alzheimer's disease. *J Neurosci*. 24:2304–2312.
